# Supplementary material for: The effects of formation modes of ferrihydrite-low molecular weight organic matter composites on the adsorption of Cd(ii)
Source: Royal Society of Chemistry journal article supplement (doi:10.1039/d4em00710g), 2025-01-01
Supplement: d4em00710g1.pdf [file d4em00710g1.pdf]

1

## Supporting Information

2

### 3 **The Effects of Formation Modes of Ferrihydrite-Low Molecular** 4 **Weight Organic Matter Composites on the Adsorption of Cd(II)**

5 Xin Nie, Erping Bi\*, Shiyun Qiu

6 *School of Water Resources and Environment, Key Laboratory of Groundwater Conservation*  
7 *of MWR, and Beijing Key Laboratory of Water Resources and Environmental Engineering,*  
8 *China University of Geosciences (Beijing), Beijing 100083, P. R. China*

9

10 Emails of Authors:

11 Xin Nie: [xinie1999@163.com](mailto:xinie1999@163.com)

12 Erping Bi: [bi@cugb.edu.cn](mailto:bi@cugb.edu.cn)

13 Shiyun Qiu: 13167515266@163.com

14

15 \*Corresponding Author:

16 Erping Bi

17 Email: [bi@cugb.edu.cn](mailto:bi@cugb.edu.cn)

18

19

20 This supplemental information contains 5 figures and 14 tables. This document contains  
21 10 pages including this cover page.

22

23

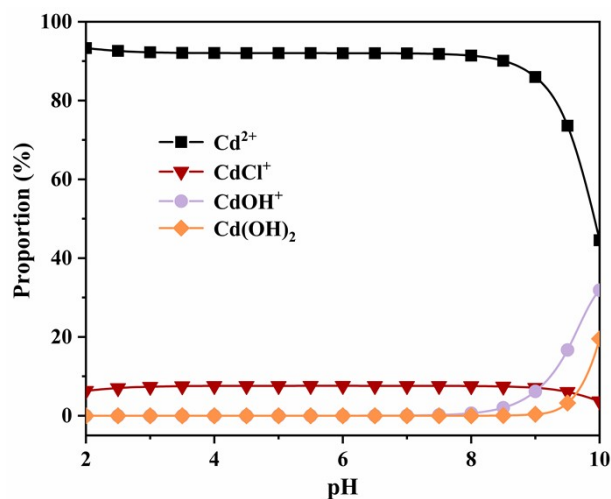

24

25 Fig. S1. The main species of Cd (calculated by the Visual Minteq3.1) in solution. (Background  
26 electrolyte was 1.0 mM NaCl, Cd concentration was 2.0 mg L<sup>-1</sup>.)

27

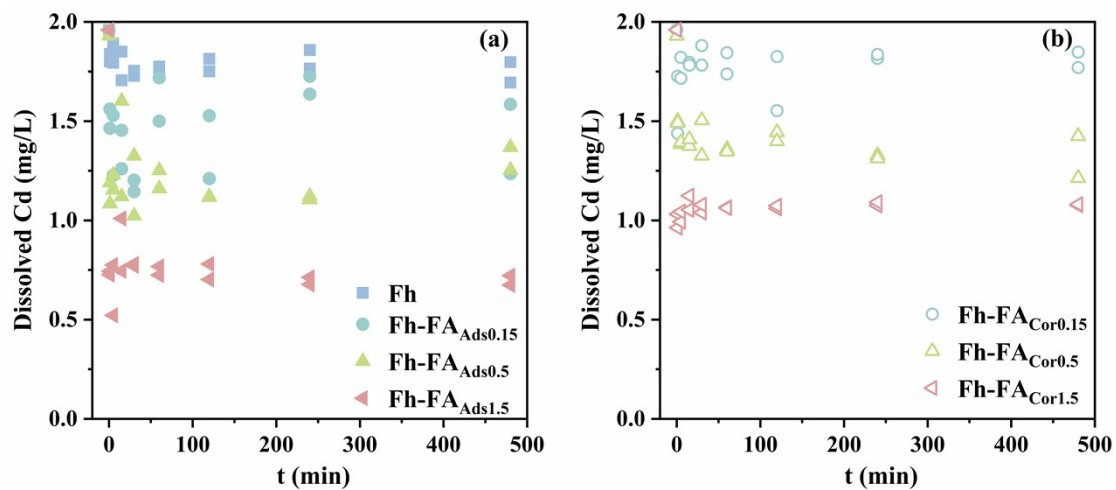

28

29 Fig. S2. Adsorption kinetics of Cd(II) on adsorption composites (a) and coprecipitates (b). (pH was  
30 5.5–6.5, background electrolyte was 1.0 mM NaCl, Cd concentration was 1.95 mg L<sup>-1</sup>, and  
31 adsorbent concentration was 0.2 g/L.)

32

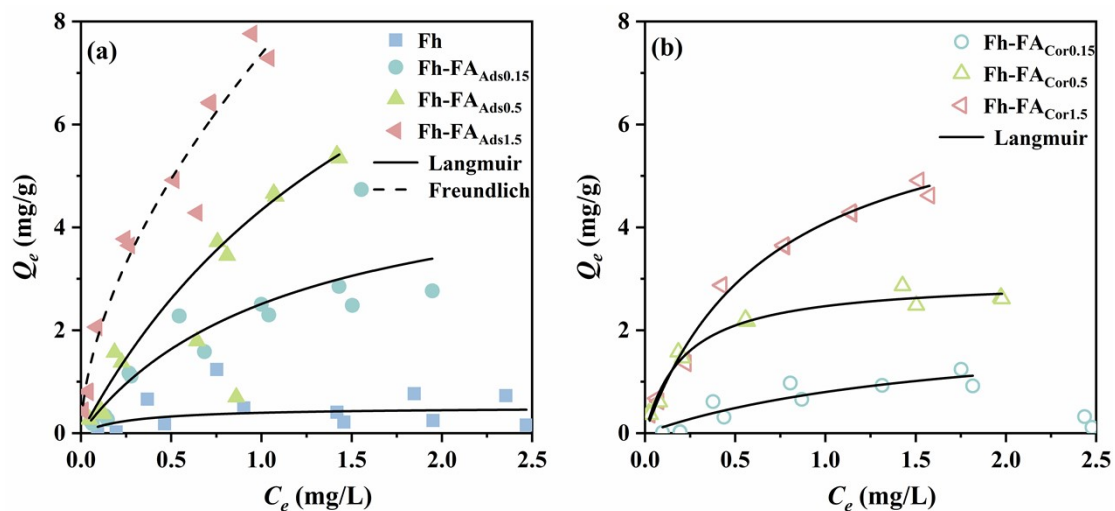

33

34

35 Fig. S3. Adsorption isotherm results of Cd(II) on adsorption composites (a) and coprecipitates (b).

36 (pH was 5.5–6.5, background electrolyte was 1 mM NaCl, and adsorbent concentration was 0.2 g

37 L<sup>-1</sup>.)

38

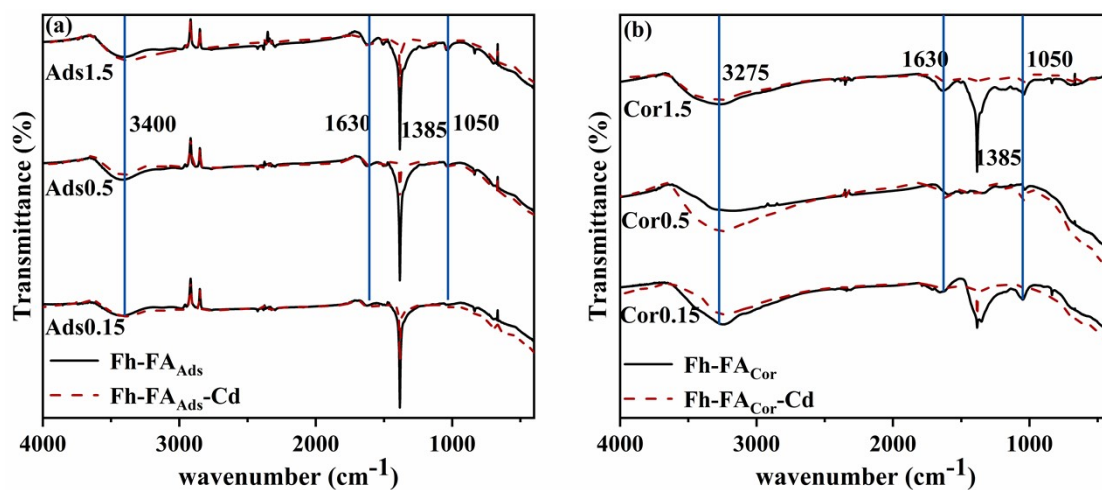

39

40 Fig. S4. FTIR spectra of adsorption composites (a) and coprecipitates (b) before and after reaction

41 with Cd(II). Cd(II) initial concentration is 2.0 mg L<sup>-1</sup>.

42

43

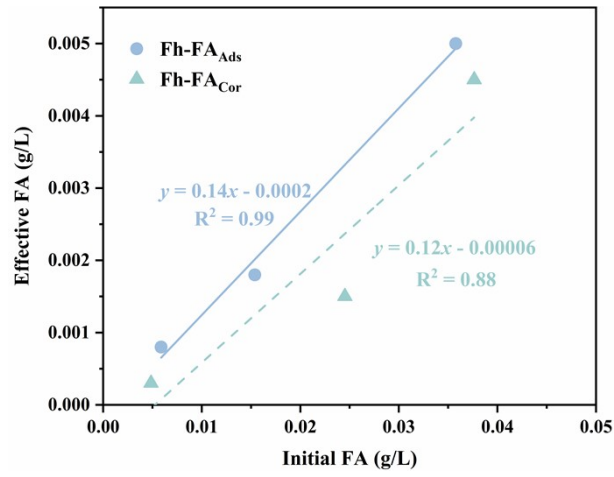

44

45 Fig. S5. The relationship between the model effective concentration of FA and the initial  
 46 concentration in the composites.

47

48 Table S1. Elemental composition and fulvic acid (FA) content of the materials

| Materials                | C content (mg g <sup>-1</sup> ) | FA content (mg g <sup>-1</sup> ) | C/Fe molar ratios of product <sup>1)</sup> |
|--------------------------|---------------------------------|----------------------------------|--------------------------------------------|
| FA                       | 415.85±1.44                     |                                  |                                            |
| Fh-FA <sub>Ads0.15</sub> | 14.39±0.04                      | 29.41                            | 0.14                                       |
| Fh-FA <sub>Ads0.5</sub>  | 38.06±0.15                      | 76.88                            | 0.40                                       |
| Fh-FA <sub>Ads1.5</sub>  | 87.50±1.61                      | 178.84                           | 1.05                                       |
| Fh-FA <sub>Cor0.15</sub> | 12.01±0.86                      | 24.25                            | 0.12                                       |
| Fh-FA <sub>Cor0.5</sub>  | 52.03±0.19                      | 122.60                           | 0.49                                       |
| Fh-FA <sub>Cor1.5</sub>  | 92.08±0.03                      | 188.20                           | 1.12                                       |

49 Note: The C/Fe molar ratios of product was calculated using the chemical formula of Ferrihydrite

50 (Fh) (Fe<sub>5</sub>HO<sub>8</sub> • 4H<sub>2</sub>O)<sup>1</sup>.

51

52

53 Table S2. Fitting results of parameters of the adsorption isotherm models

| Adsorbent                | Langmuir                                      |                                               | R <sup>2</sup> | Freundlich                                                                            |      |                |
|--------------------------|-----------------------------------------------|-----------------------------------------------|----------------|---------------------------------------------------------------------------------------|------|----------------|
|                          | <i>Q<sub>m</sub></i><br>(mg g <sup>-1</sup> ) | <i>K<sub>L</sub></i><br>(L mg <sup>-1</sup> ) |                | <i>K<sub>f</sub></i><br>((mg g <sup>-1</sup> )/(mg L <sup>-1</sup> ) <sup>1/n</sup> ) | 1/n  | R <sup>2</sup> |
| Fh                       | 0.51                                          | 3.52                                          | 0.15           | 0.36                                                                                  | 0.31 | 0.10           |
| Fh-FA <sub>Ads0.15</sub> | 5.40                                          | 0.87                                          | 0.80           | 2.37                                                                                  | 0.63 | 0.78           |
| Fh-FA <sub>Ads0.5</sub>  | 12.77                                         | 0.51                                          | 0.99           | 4.22                                                                                  | 0.77 | 0.98           |
| Fh-FA <sub>Ads1.5</sub>  | 10.47                                         | 2.03                                          | 0.95           | 7.38                                                                                  | 0.58 | 0.96           |
| Fh-FA <sub>Cor0.15</sub> | 2.18                                          | 0.58                                          | 0.82           | 0.75                                                                                  | 0.73 | 0.79           |
| Fh-FA <sub>Cor0.5</sub>  | 3.01                                          | 4.58                                          | 0.98           | 2.26                                                                                  | 0.35 | 0.90           |
| Fh-FA <sub>Cor1.5</sub>  | 6.95                                          | 1.43                                          | 0.99           | 3.93                                                                                  | 0.56 | 0.97           |

54

55 Table S3. 2D-FTIR-COS results on the assignment and sign of each cross-peak in synchronous and

56 asynchronous (in parentheses) maps of Fh-FA<sub>Ads0.15</sub>-Cd

| Position (cm <sup>-1</sup> ) | Peak assignment | Sign |      |
|------------------------------|-----------------|------|------|
|                              |                 | 3400 | 1385 |
| 3400                         | -OH             |      |      |
| 1385                         | R-COO-Fe        | +(-) |      |
| 500                          | Fe-O-Fe         | +(-) | +(+) |

57

58

59

60 Table S4. 2D-FTIR-COS results on the assignment and sign of each cross-peak in synchronous and  
 61 asynchronous (in parentheses) maps of Fh-FA<sub>Ads0.5</sub>-Cd

| Position (cm <sup>-1</sup> ) | Peak assignment | Sign |      |
|------------------------------|-----------------|------|------|
|                              |                 | 3400 | 1385 |
| 3400                         | -OH             |      |      |
| 1385                         | R-COO-Fe        | +(-) |      |
| 500                          | Fe-O-Fe         | +(-) | +(-) |

62

63

64 Table S5. 2D-FTIR-COS results on the assignment and sign of each cross-peak in synchronous and  
 65 asynchronous (in parentheses) maps of Fh-FA<sub>Ads1.5</sub>-Cd

| Position (cm <sup>-1</sup> ) | Peak assignment | Sign |      |
|------------------------------|-----------------|------|------|
|                              |                 | 3400 | 1385 |
| 3400                         | -OH             |      |      |
| 1385                         | R-COO-Fe        | +(+) |      |
| 500                          | Fe-O-Fe         | +(-) | +(-) |

66

67

68

69 Table S6. 2D-FTIR-COS results on the assignment and sign of each cross-peak in synchronous and  
 70 asynchronous (in parentheses) maps of Fh-FA<sub>Cor0.15</sub>-Cd

| Position (cm <sup>-1</sup> ) | Peak assignment  | Sign |      |      |
|------------------------------|------------------|------|------|------|
|                              |                  | 3400 | 1630 | 1050 |
| 3400                         | -OH              |      |      |      |
| 1630                         | COO <sup>-</sup> | +(+) |      |      |
| 1050                         | alcoholic C-O    | +(-) | +(-) |      |
| 450                          | Fe-O-Fe          | +(-) | +(-) | +(-) |

71

72

73

74

75

76

77 Table S7. 2D-FTIR-COS results on the assignment and sign of each cross-peak in synchronous and  
78 asynchronous (in parentheses) maps of Fh-FA<sub>Cor0.5</sub>-Cd

| Position (cm <sup>-1</sup> ) | Peak assignment  | Sign |      |      |
|------------------------------|------------------|------|------|------|
|                              |                  | 3400 | 1630 | 1050 |
| 3400                         | -OH              |      |      |      |
| 1630                         | COO <sup>-</sup> | +(+) |      |      |
| 1050                         | alcoholic C-O    | +(-) | +(-) |      |
| 500                          | Fe-O-Fe          | +(+) | +(+) | +(+) |

79

80

81 Table S8. 2D-FTIR-COS results on the assignment and sign of each cross-peak in synchronous and  
82 asynchronous (in parentheses) maps of Fh-FA<sub>Cor1.5</sub>-Cd

| Position (cm <sup>-1</sup> ) | Peak assignment  | Sign |      |      |
|------------------------------|------------------|------|------|------|
|                              |                  | 3275 | 1630 | 1050 |
| 3275                         | -OH              |      |      |      |
| 1630                         | COO <sup>-</sup> | +(-) |      |      |
| 1050                         | alcoholic C-O    | +(-) | +(-) |      |
| 450                          | Fe-O-Fe          | -(+) | -(+) | -(+) |

83

84

85 Table S9. The contents of Fh, FA and dissolved organic carbon (DOC) in adsorption isotherm  
86 experiments

| Composites type          | Fh (g/L) | FA (g/L) | DOC (mg C L <sup>-1</sup> ) |
|--------------------------|----------|----------|-----------------------------|
| Fh-FA <sub>Ads0.15</sub> | 0.164    | 0.006    | 1.09                        |
| Fh-FA <sub>Ads0.5</sub>  | 0.153    | 0.015    | 2.17                        |
| Fh-FA <sub>Ads1.5</sub>  | 0.134    | 0.036    | 6.59                        |
| Fh-FA <sub>Cor0.15</sub> | 0.163    | 0.005    | 1.07                        |
| Fh-FA <sub>Cor0.5</sub>  | 0.171    | 0.024    | 1.59                        |
| Fh-FA <sub>Cor1.5</sub>  | 0.132    | 0.037    | 6.72                        |

87

88

89 Table S10. Input concentrations of Fh and FA of composites with different C/Fe molar ratios in  
 90 surface complexation models

| Composites type          | Effective Fh (g/L) | Effective FA (g/L) | DOC (mg C L <sup>-1</sup> )* |
|--------------------------|--------------------|--------------------|------------------------------|
| Fh-FA <sub>Ads0.15</sub> | 0.158              | 0.0008             | 0.50                         |
| Fh-FA <sub>Ads0.5</sub>  | 0.139              | 0.0018             | 1.67                         |
| Fh-FA <sub>Ads1.5</sub>  | 0.106              | 0.0050             | 6.00                         |
| Fh-FA <sub>Cor0.15</sub> | 0.158              | 0.0003             | 0.50                         |
| Fh-FA <sub>Cor0.5</sub>  | 0.150              | 0.0015             | 1.00                         |
| Fh-FA <sub>Cor1.5</sub>  | 0.103              | 0.0045             | 6.20                         |

91 \*: the input DOC concentration was subtracted from the background DOC concentration in  
 92 ultrapure water.

93

94

95 Table S11. CD-MUSIC model parameters of Fh

| Model parameters                                                         | Fh*  |
|--------------------------------------------------------------------------|------|
| Specific surface area (m <sup>2</sup> /g)                                | 650  |
| Site density $\equiv\text{FeOH}^{0.5-}$ (sites/nm <sup>2</sup> )         | 6.25 |
| Site density $\equiv\text{Fe}_3\text{O}^{0.5-}$ (sites/nm <sup>2</sup> ) | 1.55 |
| C <sub>in</sub> (F/m <sup>2</sup> )                                      | 1.15 |
| C <sub>out</sub> (F/m <sup>2</sup> )                                     | 0.90 |

96 \*: the parameters of ferrihydrite were adopted from <sup>2</sup>.

97

98

99 Table S12. Surface complexation reaction between Fh and Cd(II)

| Ferrihydrite-Cd                                                                                       | ( $\Delta Z_0, \Delta Z_1, \Delta Z_2$ ) | logK                     |
|-------------------------------------------------------------------------------------------------------|------------------------------------------|--------------------------|
| $\text{FeOH}^{0.5-} + \text{H}^+ = \text{FeOH}_2^{0.5+}$                                              | (1, 0, 0)                                | 8.10                     |
| $\text{FeOH}^{0.5-} + \text{Na}^+ = \text{FeOHNa}^{0.5+}$                                             | (0, 1, 0)                                | -0.60                    |
| $\text{FeOH}^{0.5-} + \text{H}^+ + \text{Cl}^- = \text{FeOH}_2\text{Cl}^{0.5-}$                       | (1, -1, 0)                               | 7.65                     |
| $\text{Fe}_3\text{O}^{0.5-} + \text{H}^+ = \text{Fe}_3\text{OH}^{0.5+}$                               | (1, 0, 0)                                | 8.10                     |
| $\text{Fe}_3\text{O}^{0.5-} + \text{Na}^+ = \text{Fe}_3\text{ONa}^{0.5+}$                             | (0, 1, 0)                                | -0.60                    |
| $\text{Fe}_3\text{O}^{0.5-} + \text{H}^+ + \text{Cl}^- = \text{Fe}_3\text{OHCl}^{0.5-}$               | (1, -1, 0)                               | 7.65                     |
| $2\text{FeOH}^{0.5-} + \text{Cd}^{2+} + \text{H}_2\text{O} = (\text{FeOH})_2\text{CdOH} + \text{H}^+$ | (0.5, 0.5, 0)                            | -2.35 (99%) <sup>a</sup> |
|                                                                                                       | (0.5, 0.5, 0)                            | 0.68 (1%) <sup>a</sup>   |

100 <sup>a</sup>: the LogK values were adopted from <sup>3</sup>.

101



102 Table S13. The optimized complexation constant of Fh-Cd

| Composites type          | $\log K_{\text{Fh-Cd}(99\%)}$ |
|--------------------------|-------------------------------|
| Fh-FA <sub>Ads0.15</sub> | -0.35                         |
| Fh-FA <sub>Ads0.5</sub>  | -0.2                          |
| Fh-FA <sub>Ads1.5</sub>  | -0.2                          |
| Fh-FA <sub>Cor0.15</sub> | -1.1                          |
| Fh-FA <sub>Cor0.5</sub>  | -2.15                         |
| Fh-FA <sub>Cor1.5</sub>  | -1                            |

103

104

105 Table S14. NICA-Donnan model parameters of FA and surface complexation reactions between

106 FA and Cd(II)

| NICA-Donnan model parameters <sup>a</sup>                  |                          |      |      |                       |
|------------------------------------------------------------|--------------------------|------|------|-----------------------|
| Functional group                                           | Site density<br>(mol/kg) | p    | nH   | b                     |
| carboxyl                                                   | 5.88                     | 0.57 | 0.66 | 0.57                  |
| Phenolic hydroxyl                                          | 1.86                     | 0.59 | 0.76 |                       |
| Surface complexation reaction                              |                          |      |      | $\log K$ <sup>b</sup> |
| R-COO <sup>-</sup> +H <sup>+</sup> =R-COOH                 |                          |      |      | 2.34                  |
| R-COO <sup>-</sup> +Cd <sup>2+</sup> =R-COOCd <sup>+</sup> |                          |      |      | -0.97                 |
| R-O <sup>-</sup> +H <sup>+</sup> =R-OH                     |                          |      |      | 8.60                  |
| R-O <sup>-</sup> +Cd <sup>2+</sup> =R-OCd <sup>+</sup>     |                          |      |      | 0.5                   |

107 <sup>a</sup>: the NICA-Donnan model parameters of FA; <sup>b</sup>: the LogK values were adopted from <sup>4,5</sup>.

108

110 **References**

- 111 1. K. M. Towe and W. F. Bradley, *Mineralogical constitution of colloidal "hydrous ferric oxides"*,  
112 *Journal of Colloid and Interface Science*, 1967, **24**, 384-392.
- 113 2. C. Tiberg, C. Sjostedt, I. Persson and J. P. Gustafsson, *Phosphate effects on copper(II) and lead(II)*  
114 *sorption to ferrihydrite*, *Geochimica et Cosmochimica Acta*, 2013, **120**, 140-157.
- 115 3. Y. Liang, L. Tian, Y. Lu, L. Peng, P. Wang, J. Lin, T. Cheng, Z. Dang and Z. Shi, *Kinetics of Cd (II)*  
116 *adsorption and desorption on ferrihydrite: experiments and modeling*, *Environmental Science:*  
117 *Processes & Impacts*, 2018, **20**, 934-942.
- 118 4. C. J. Milne, D. G. Kinniburgh and E. Tipping, *Generic NICA-Donnan model parameters for proton*  
119 *binding by humic substances*, *Environmental Science & Technology*, 2001, **35**, 2049-2059.
- 120 5. C. J. Milne, D. G. Kinniburgh, W. H. Van Riemsdijk and E. Tipping, *Generic NICA-Donnan model*  
121 *parameters for metal-ion binding by humic substances*, *Environmental Science & Technology*, 2003,  
122 **37**, 958-971.
